# Supplementary material for: Mge1, a nucleotide exchange factor of Hsp70, acts as an oxidative sensor to regulate mitochondrial Hsp70 function
Source: PubMed Central journal article supplement — Mol Biol Cell. 2013 Mar 15;24(6):692–703. doi: 10.1091/mbc.E12-10-0719 (PMC3596242; doi:10.1091/mbc.e12-10-0719), 2013-03-15

**Figure legend for Fig.S1:**

**Figure S1:** Met 155 of Mge1 protein is exposed towards the surface of protein: Structure of yeast Mge1 was generated using a freeware, I-TASSER and best of the five models was taken and refined further (A). Position of the Met 155 was shown using PyMol (B)

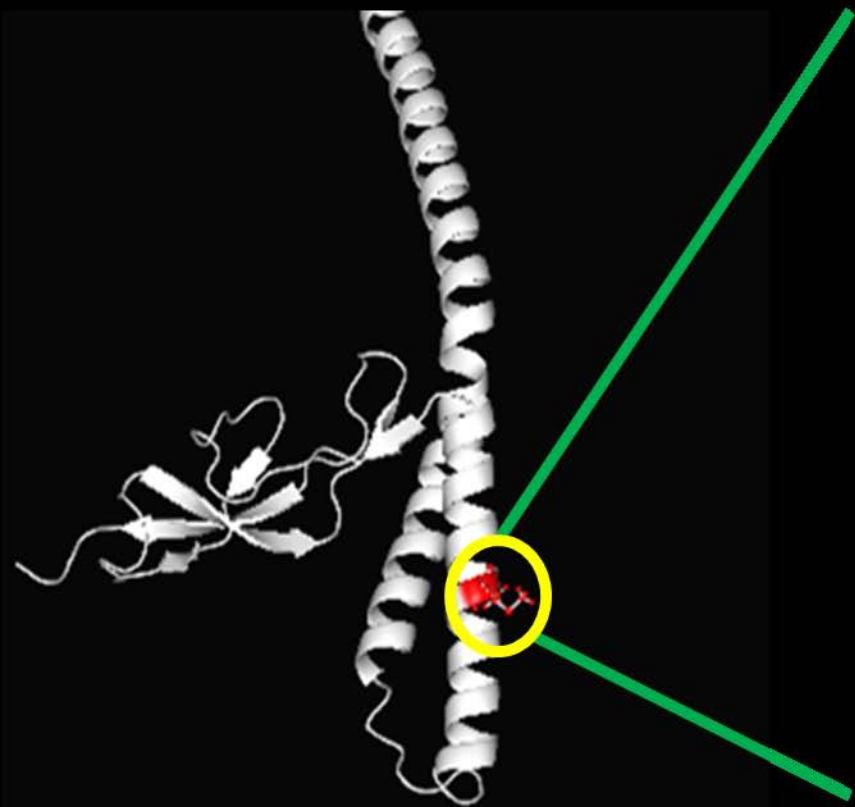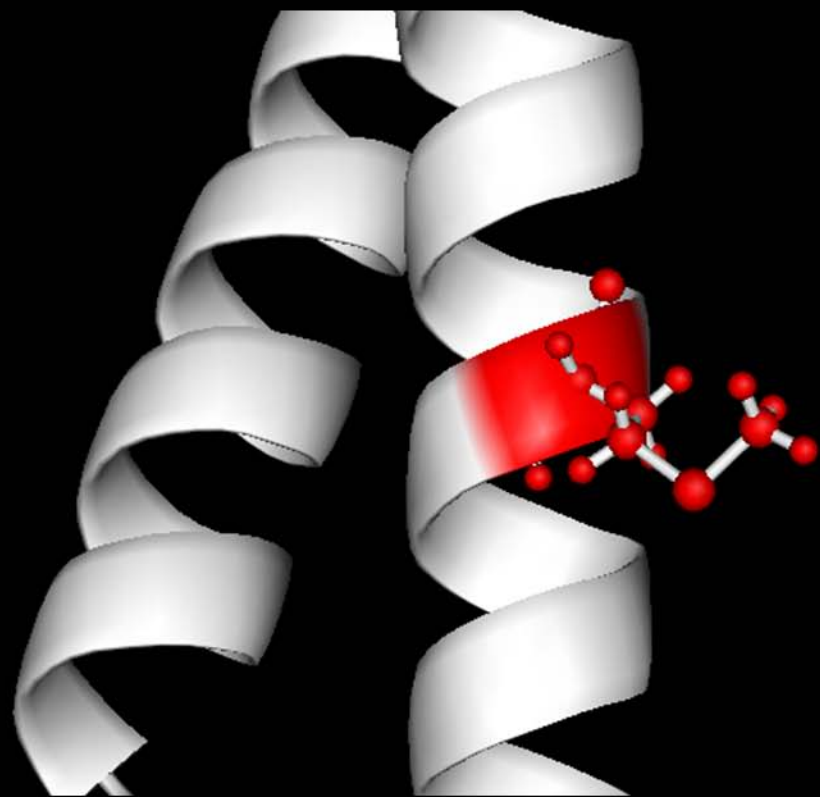

Supplement: supp_E12-10-0719v1_CombinedSupMats.pdf [file supp_E12-10-0719v1_CombinedSupMats.pdf]
